# Supplementary material for: The Impact of Lifestyle Intervention on Dietary Quality among Rural Women with Previous Gestational Diabetes Mellitus—A Randomized Controlled Study
Source: MDPI journal article supplement (doi:10.3390/nu13082642), 2021-07-30
Supplement: s1 [file s1]

**Supplementary Table S1.** CHEI scoring system

| Component                    | Maximum points | Standard for maximum point               | Standard for zero point                  |
|------------------------------|----------------|------------------------------------------|------------------------------------------|
| Adequacy                     |                |                                          |                                          |
| Total grains                 | 5              | $\geq 2.5\text{SP}/1000 \text{ kcal}$    | No intake                                |
| Whole Grains and mixed beans | 5              | $\geq 0.6\text{SP}/1000 \text{ kcal}$    | No intake                                |
| Tubers                       | 5              | $\geq 0.3\text{SP}/1000 \text{ kcal}$    | No intake                                |
| Total vegetables             | 5              | $\geq 1.9\text{SP}/1000 \text{ kcal}$    | No intake                                |
| Dark vegetables              | 5              | $\geq 0.9\text{SP}/1000 \text{ kcal}$    | No intake                                |
| Fruits                       | 10             | $\geq 1.1\text{SP}/1000 \text{ kcal}$    | No intake                                |
| Dairy                        | 5              | $\geq 0.5\text{SP}/1000 \text{ kcal}$    | No intake                                |
| Soybeans                     | 5              | $\geq 0.4\text{SP}/1000 \text{ kcal}$    | No intake                                |
| Fish and Seafood             | 5              | $\geq 0.6\text{SP}/1000 \text{ kcal}$    | No intake                                |
| Poultry                      | 5              | $\geq 0.3\text{SP}/1000 \text{ kcal}$    | No intake                                |
| Eggs                         | 5              | $\geq 0.5\text{SP}/1000 \text{ kcal}$    | No intake                                |
| Seeds and Nuts               | 5              | $\geq 0.4\text{SP}/1000 \text{ kcal}$    | No intake                                |
| Moderation                   |                |                                          |                                          |
| Added sugars                 | 5              | $\leq 10\% \text{ of energy}$            | $\geq 20\% \text{ of energy}$            |
| Sodium                       | 10             | $\leq 1000 \text{ mg}/1000 \text{ kcal}$ | $\geq 3608 \text{ mg}/1000 \text{ kcal}$ |
| Cooking oils                 | 10             | $\leq 15.6 \text{ g}/1000 \text{ kcal}$  | $\geq 32.6 \text{ g}/1000 \text{ kcal}$  |
| Red meat                     | 5              | $\leq 0.4 \text{ SP}/1000 \text{ kcal}$  | $\geq 3.5 \text{ SP}/1000 \text{ kcal}$  |
| Alcohol                      | 5              | $\leq 15 \text{ g}$                      | $\geq 40\text{g}$                        |

**Supplementary Table S2.** Baseline energy / nutrient intake

| Dietary parameter  | Mean (SD)/<br>Median (Range) | Prevalence (%) |          |           | CDG<br>recommendation<br>(RNI/EER,<br>AMDR) |
|--------------------|------------------------------|----------------|----------|-----------|---------------------------------------------|
|                    |                              | Insufficient   | Adequate | Excessive |                                             |
| Energy (kcal)      | 2028.9 (541.0)               | 43.8           | 26.5     | 29.7      | 1800/2100/2400*                             |
| Carbohydrate (%E)  | 52.1 (26.9-76.5)             | 41.0           | 53.1     | 5.9       | 50~65                                       |
| Protein (g)        | 65.1 (23.4)                  | 26.7           | 17.5.    | 55.8      | 55                                          |
| Fat (%E)           | 35.6 (18.3-61.3)             | 0.7            | 20.6     | 78.7      | 20-30                                       |
| Calcium (mg)       | 373.6 (177.7)                | 96.9           | 0.7      | 2.4       | 800                                         |
| Iron (mg)          | 20.4 (7.9)                   | 43.9           | 23.9     | 32.3      | 20                                          |
| Zinc (mg)          | 12.4 (4.1)                   | 7.0            | 5.2      | 87.8      | 7.5                                         |
| Vitamin A (µg RAE) | 508.3 (465.0)                | 73.8           | 9.4      | 16.8      | 700                                         |
| Vitamin E (mg)     | 24.4 (7.5)                   | 1.4            | 3.9      | 94.7      | 14                                          |
| Thiamine (mg)      | 0.7 (0.3)                    | 90.9           | 4.9      | 4.2       | 1.2                                         |
| Riboflavin (mg)    | 0.8 (0.3)                    | 85.7           | 8.4      | 5.9       | 1.2                                         |
| Vitamin C (mg)     | 84.5 (60.1)                  | 63.3           | 11.9     | 24.8      | 100                                         |
| Niacin (mg NE)     | 19.7(7.5)                    | 7.7            | 10.1     | 82.2      | 12                                          |
| Folate (µg DFE)    | 137.4(88.3)                  | 98.0           | 0        | 2.0       | 400                                         |

CDG, Chinese Dietary Guideline-2016; RNI, recommend nutrients intake; EER, estimated energy requirement; AMDR, acceptable macronutrient distribution ranges.

\* estimated energy requirement according to different categories of physical activity

**Supplementary Table S3.** Change of energy/nutrients intake in the intervention and control group

| Energy/nutrient    | Intervention    |               | Control        |               | <i>p</i><br>(intervention<br>vs control at<br>follow-up<br>visit) |
|--------------------|-----------------|---------------|----------------|---------------|-------------------------------------------------------------------|
|                    | Baseline        | Follow-up     | Baseline       | Follow-up     |                                                                   |
| Energy (kcal)      | 2041.5(578.2)   | 2017.2(506.0) | 2017.2(506.0)  | 2037.9(574.6) | 0.093                                                             |
| Carbohydrate (g)   | 258.7 (77.9)    | 223.5(59.8)   | 263.7 (89.9)   | 239.6(70.8)   | 0.038                                                             |
| Protein (g)        | 67.6 (24.6)     | 64.1 (22.5)   | 62.9 (21.9)    | 65.0 (25.2)   | 0.752                                                             |
| Fat (g)            | 84.7 (32.6)     | 59.1 (21.3)   | 80.2(27.6)     | 60.8(23.0)    | 0.496                                                             |
| Calcium (mg)       | 369.3 (174.9)   | 402.7 (203.9) | 377.4 (180.6)  | 384.8(203.2)  | 0.456                                                             |
| Iron (mg)          | 20.9 (7.7)      | 21.6 (10.9)   | 19.9 (8.2)     | 21.9 (9.2)    | 0.790                                                             |
| Zinc (mg)          | 12.6 (4.32)     | 11.9 (3.7)    | 12.1 (3.76)    | 12.6 (3.9)    | 0.126                                                             |
| Vitamin A (µg RAE) | 526.3 (540.4)   | 670.6(1537.9) | 491.7 (384.0)  | 537.0(436.1)  | 0.310                                                             |
| Vitamin E (mg)     | 24.9(7.9)       | 23.3(6.9)     | 23.9(7.1)      | 22.6 (6.9)    | 0.440                                                             |
| Thiamine (mg)      | 0.7 (0.3)       | 0.7 (0.3)     | 0.7 (0.2)      | 0.7 (0.3)     | 0.495                                                             |
| Riboflavin (mg)    | 0.7 (0.3)       | 0.8 (0.7)     | 0.7 (0.3)      | 0.8 (0.3)     | 0.630                                                             |
| Vitamin C (mg)     | 88.6 (67.7)     | 92.7 (77.7)   | 84.5 (52.3)    | 91.1 (91.3)   | 0.870                                                             |
| Niacin (mg NE)     | 20.263 (7.9)    | 18.9 (7.3)    | 19.11(7.0)     | 20.1 (6.6)    | 0.147                                                             |
| Folate (µg DFE)    | 143.179 (103.2) | 169.3 (125.2) | 131.207 (69.2) | 162.3(118.3)  | 0.627                                                             |

**Supplementary Table S4.** The proportion of the women who consumed adequate energy/nutrient at baseline and follow-up visit

| Proportion           | Intervention |           | Control  |           | <i>p</i><br>(intervention<br>vs control at<br>follow-up<br>visit) |
|----------------------|--------------|-----------|----------|-----------|-------------------------------------------------------------------|
|                      | Baseline     | Follow-up | Baseline | Follow-up |                                                                   |
| Energy               | 23.5         | 31.4*     | 29.3     | 28.6      | 0.259                                                             |
| Carbohydrate<br>(%E) | 50.4         | 35.7*     | 55.7     | 36.9*     | 0.835                                                             |
| Protein              | 17.6         | 29.0      | 17.4     | 22.8      | 0.451                                                             |
| Fat (%E)             | 17.5         | 68.5*     | 23.4     | 68.8*     | 0.423                                                             |
| Calcium              | 0.7          | 2.2       | 0.7      | 4.7       | 0.465                                                             |
| Iron                 | 21.3         | 23.9      | 26.2     | 24.2*     | 0.366                                                             |
| Zinc                 | 3.6          | 3.6       | 6.7      | 5.4       | 0.715                                                             |
| Vitamin A            | 9.5          | 10.1      | 9.4      | 9.4       | 0.959                                                             |
| Vitamin E            | 3.7          | 2.2       | 4.0      | 6.7       | 0.182                                                             |
| Thiamine             | 5.8          | 7.2       | 4.0      | 9.4       | 0.656                                                             |
| Riboflavin           | 9.5          | 10.1      | 7.4      | 14.1      | 0.585                                                             |
| Vitamin C            | 15.3         | 8.0       | 8.7      | 14.8      | 0.122                                                             |
| Niacin               | 8.8          | 8.0       | 11.4     | 6.7       | 0.871                                                             |
| Folate               | 0            | 1.4       | 0        | 1.3       | 0.578                                                             |

\* $p < 0.05$  between baseline and follow-up within intervention or control group
